# Supplementary material
Source: PubMed Central journal article supplement (PMC1636574)

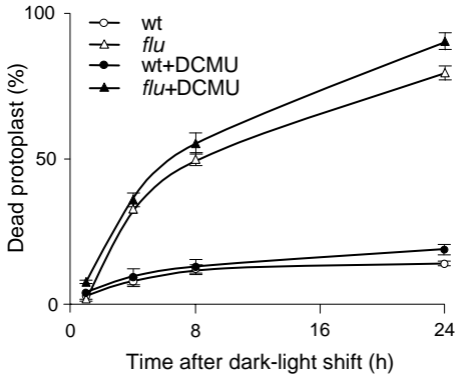

Supplement: pnas_0608139103_1.pdf [file pnas_0608139103_1.pdf]

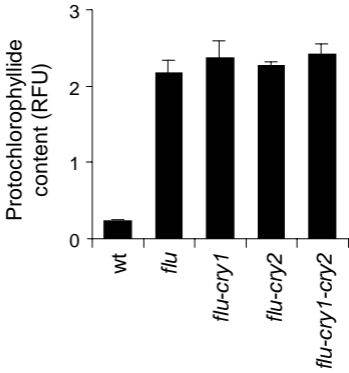

Supplement: pnas_0608139103_2.pdf [file pnas_0608139103_2.pdf]
